# Supplementary material for: Diversity of Omicron sublineages and clinical characteristics in hospitalized patients in the southernmost state of Brazil
Source: PubMed Central journal article supplement (PMC10863127; doi:10.1186/s12879-024-09089-3), 2024-02-13
Supplement: 12879_2024_9089_MOESM1_ESM.pdf [file 12879_2024_9089_MOESM1_ESM.pdf]

**Table Supplementary Material 1:**

GISAID Identifier: EPI\_SET\_240202vg

doi: [10.55876/gis8.240202vg](https://doi.org/10.55876/gis8.240202vg)

All genome sequences and associated metadata in this dataset are published in GISAID's EpiCoV database. To view the contributors of each individual sequence with details such as accession number, Virus name, Collection date, Originating Lab and Submitting Lab and the list of Authors, visit <https://doi.org/10.55876/gis8.240202vg>

| Accession ID                                                                                                                                                                                                                                                                                                                                                                                                                                                                                                                                                                                                                                                                                                                                   | Originating Laboratory                                              | Submitting Laboratory                | Authors                                                                                                                                                                                                                                                          |
|------------------------------------------------------------------------------------------------------------------------------------------------------------------------------------------------------------------------------------------------------------------------------------------------------------------------------------------------------------------------------------------------------------------------------------------------------------------------------------------------------------------------------------------------------------------------------------------------------------------------------------------------------------------------------------------------------------------------------------------------|---------------------------------------------------------------------|--------------------------------------|------------------------------------------------------------------------------------------------------------------------------------------------------------------------------------------------------------------------------------------------------------------|
| EPI_ISL_17238976, EPI_ISL_17238975,<br>EPI_ISL_17238977, EPI_ISL_17238978,<br>EPI_ISL_17238979, EPI_ISL_17238980,<br>EPI_ISL_17238981, EPI_ISL_17238982,<br>EPI_ISL_17238983, EPI_ISL_17238984,<br>EPI_ISL_17238985, EPI_ISL_17238986,<br>EPI_ISL_17394927, EPI_ISL_17238987,<br>EPI_ISL_17238988, EPI_ISL_17238989,<br>EPI_ISL_17238990, EPI_ISL_17238991,<br>EPI_ISL_17238992, EPI_ISL_17238993,<br>EPI_ISL_17238994, EPI_ISL_17238995,<br>EPI_ISL_17394928, EPI_ISL_17238996,<br>EPI_ISL_17238997, EPI_ISL_17238998,<br>EPI_ISL_17238999, EPI_ISL_17239001,<br>EPI_ISL_17239000, EPI_ISL_17239002,<br>EPI_ISL_17239003, EPI_ISL_17239004,<br>EPI_ISL_17239005, EPI_ISL_17321597,<br>EPI_ISL_17239006, EPI_ISL_17239007,<br>EPI_ISL_17239008 | Laboratório de Microbiologia<br>Molecular - Universidade<br>Feevale | Molecular Microbiology<br>Laboratory | Alana Witt Hansen, Fernando<br>Rosado Spilki, Juliana Schons<br>Gularte, Juliane Deise Fleck,<br>Mariana Soares da Silva,<br>Meriane Demoliner, Matheus<br>Nunes Weber, Vyctoria<br>Malayhka, Paula Rodrigues de<br>Almeida, Micheli Filippi, Viviane<br>Girardi |
