# Supplementary material for: Diversity of Omicron sublineages and clinical characteristics in hospitalized patients in the southernmost state of Brazil
Source: PubMed Central journal article supplement (PMC10863127; doi:10.1186/s12879-024-09089-3), 2024-02-13
Supplement: 12879_2024_9089_MOESM2_ESM.pdf [file 12879_2024_9089_MOESM2_ESM.pdf]

**Table Supplementary Material 2:** Data of the sequences generated from the analyses by the CZ ID program.

| Sample ID | Coverage Depth | Coverage Breadth | %id  | GC Content | Total Reads | Mapped Reads |
|-----------|----------------|------------------|------|------------|-------------|--------------|
| 72451     | 291.3x         | 98.7%            | 99.8 | 37.9       | 86612       | 78968        |
| 72458     | 698.5x         | 98.8%            | 99.7 | 37.9       | 199582      | 183249       |
| 72480     | 363.7x         | 98.9%            | 99.8 | 37.9       | 103418      | 94996        |
| 72483     | 532.1x         | 98.7%            | 99.8 | 37.9       | 156572      | 142977       |
| 72488     | 399.9x         | 99.0%            | 99.8 | 37.8       | 112142      | 103790       |
| 72490     | 235.4x         | 93.8%            | 99.8 | 37.8       | 76380       | 65805        |
| 72494     | 583.8x         | 99.4%            | 99.8 | 37.8       | 165648      | 152663       |
| 72499     | 471.3x         | 98.8%            | 99.8 | 37.9       | 131944      | 122000       |
| 72509     | 514.3x         | 99.2%            | 99.8 | 37.8       | 145594      | 134429       |
| 72519     | 363.2x         | 98.6%            | 99.8 | 37.9       | 108278      | 98690        |
| 72533     | 249.2x         | 96.7%            | 99.8 | 37.9       | 73698       | 67052        |
| 72536     | 466.5x         | 64.5%            | 99.7 | 37.7       | 137056      | 125630       |
| 72544     | 449.8x         | 99.1%            | 99.8 | 37.9       | 135546      | 119809       |
| 72546     | 458.8x         | 99.3%            | 99.8 | 37.8       | 131280      | 120651       |
| 72554     | 154.6x         | 95.3%            | 99.8 | 37.8       | 46334       | 41337        |
| 72555     | 269.4x         | 98.7%            | 99.8 | 37.8       | 79654       | 72523        |
| 72559     | 600.9x         | 99.6%            | 99.8 | 37.8       | 178128      | 161887       |
| 72567     | 738.6x         | 98.8%            | 99.8 | 37.9       | 210928      | 194880       |
| 72574     | 367.4x         | 98.9%            | 99.8 | 37.9       | 102160      | 94669        |
| 72577     | 500.6x         | 98.9%            | 99.8 | 37.8       | 141312      | 130508       |
| 72579     | 343.2x         | 99.3%            | 99.8 | 37.9       | 100182      | 91360        |
| 72583     | 332.9x         | 98.8%            | 99.8 | 37.9       | 99416       | 90409        |
| 72584     | 551.2x         | 98.9%            | 99.7 | 37.8       | 156242      | 144134       |
| 72588     | 137.8x         | 98.6%            | 99.8 | 37.8       | 39154       | 35896        |
| 72591     | 180.8x         | 95.6%            | 99.8 | 37.7       | 100318      | 48238        |
| 72599     | 290.7x         | 97.5%            | 99.7 | 37.8       | 80728       | 74848        |
| 72602     | 415.2x         | 98.8%            | 99.8 | 37.8       | 119750      | 109306       |
| 72603     | 371.6x         | 98.2%            | 99.8 | 37.8       | 110192      | 100724       |
| 72604     | 566.3x         | 99.5%            | 99.7 | 37.8       | 162740      | 148908       |
| 72624     | 422.7x         | 99.4%            | 99.7 | 37.9       | 125194      | 113945       |
| 72655     | 492.8x         | 99.1%            | 99.7 | 37.8       | 144508      | 131969       |
| 72657     | 228.7x         | 94.7%            | 99.8 | 37.7       | 66148       | 60024        |
| 72667     | 546.5x         | 97.6%            | 99.8 | 37.8       | 154890      | 142785       |
| 72693     | 194.2x         | 88.8%            | 99.8 | 37.9       | 56818       | 51644        |
| 72698     | 229.9x         | 94.8%            | 99.8 | 37.9       | 69074       | 62639        |
| 72710     | 368.4x         | 86.5%            | 99.8 | 37.8       | 108554      | 98932        |
| 72712     | 194.9x         | 94.2%            | 99.8 | 37.8       | 58598       | 52225        |

Coverage Depth: average read depth of aligned contigs and reads over the length of the accession; Coverage breadth: percentage of the accession that is covered by at least one read and contig; %id: percentage of nucleotides of the consensus genome that are identical to those in the reference accession; GC Content: percentage of bases that are either guanine (G) or cytosine (C); Mapped Reads: Number of reads aligning to the reference accession.
